# Supplementary material for: Statistical relationship between metabolic decomposition and chemical uptake predicts bioconcentration factor data for diverse chemical exposures
Source: BMC Syst Biol. 2018 Aug 7;12:81. doi: 10.1186/s12918-018-0601-y (PMC6081876; doi:10.1186/s12918-018-0601-y)
Supplement: Supplementary file 2 — Table S1 includes log10 Kow values and log10 BCF values for various chemicals as measured or derived from measurements taken in adult zebrafish. Table S2 Table S2 includes log10 Kow values and log10 BCF values for various chemicals as measured or derived from measurements taken in embryonic zebrafish. Table S3 Table S3 includes log10 Kow values and log10 BCF values for various chemicals as measured or derived from measurements taken in various other fish species. (XLSX 81 kb) [file 12918_2018_601_MOESM2_ESM.xlsx]

## Sheet: Adult Zebrafish
Chemical	Name	log Kow	log BCF	Reference
Dichlorobiphenyl	2,5	5.06	3.89	Fox, et al (1994) Ecotox and Env Safety. 28:99-109
Trichlorobiphenyl	2,2',5	5.24	4.11	Fox, et al (1994) Ecotox and Env Safety. 28:99-109
	2,4',5	5.67	4.66	Fox, et al (1994) Ecotox and Env Safety. 28:99-109
Tetrachlorobiphenyl	2,2',3,5'	5.75	4.84	Fox, et al (1994) Ecotox and Env Safety. 28:99-109
	2,2',4'5'	5.85	4.84	Fox, et al (1994) Ecotox and Env Safety. 28:99-109
	2.2',5,5'	5.84	4.92	Fox, et al (1994) Ecotox and Env Safety. 28:99-109
	2,2',6,6'	5.21	3.85	Fox, et al (1994) Ecotox and Env Safety. 28:99-109
	2,3',4',5	6.2	5.08	Fox, et al (1994) Ecotox and Env Safety. 28:99-109
	3,3',4,4'	6.36	5.36	Fox, et al (1994) Ecotox and Env Safety. 28:99-109
Pentachlorobiphenyl	2,2',3,4,5'	6.29	5.38	Fox, et al (1994) Ecotox and Env Safety. 28:99-109
	2,2',3',4,5	6.29	5.43	Fox, et al (1994) Ecotox and Env Safety. 28:99-109
	2,2',4,5,5'	6.38	5.47	Fox, et al (1994) Ecotox and Env Safety. 28:99-109
	3,3',4,4',5	6.89	5.81	Fox, et al (1994) Ecotox and Env Safety. 28:99-109
Hexachlorobiphenyl	2,2',3,3',4,4'	6.74	5.77	Fox, et al (1994) Ecotox and Env Safety. 28:99-109
	2,2',3,3',6,6'	6.22	5.43	Fox, et al (1994) Ecotox and Env Safety. 28:99-109
	2,2',3,4,4',5	6.83	5.88	Fox, et al (1994) Ecotox and Env Safety. 28:99-109
	2,2',3,4,5,5'	6.82	5.81	Fox, et al (1994) Ecotox and Env Safety. 28:99-109
	2,2',3,5,5',6'	6.64	5.54	Fox, et al (1994) Ecotox and Env Safety. 28:99-109
	2,2',4,4',5,5'	6.92	5.65	Fox, et al (1994) Ecotox and Env Safety. 28:99-109
	3,3',4,4',5,5'	7.42	5.97	Fox, et al (1994) Ecotox and Env Safety. 28:99-109
Heptachlorobiphenyl	2,2',3,4,4',5',6	7.2	5.84	Fox, et al (1994) Ecotox and Env Safety. 28:99-109
	2,2',3,4,5,5',6'	7.11	5.93	Fox, et al (1994) Ecotox and Env Safety. 28:99-109
Octachlorobiphenyl	2,2',3,3',4,4',5,5'	7.8	5.81	Fox, et al (1994) Ecotox and Env Safety. 28:99-109
	2,2',3,3',4,4',5,6	7.56	5.92	Fox, et al (1994) Ecotox and Env Safety. 28:99-109
	2,2',3,3',4,5,5',6	7.62	5.88	Fox, et al (1994) Ecotox and Env Safety. 28:99-109
	2,2',3,3',5',6,6'	7.24	5.82	Fox, et al (1994) Ecotox and Env Safety. 28:99-109
Nonachlorobiphenyl	2,2',3,3',4,4',5,5',6	8.09	5.71	Fox, et al (1994) Ecotox and Env Safety. 28:99-109
Decachlorobiphenyl	2,2',3,3',4,4',5,5',6,6'	8.48	5.44	Fox, et al (1994) Ecotox and Env Safety. 28:99-109
Aniline		0.9	0.414973	Zok, et al (1991) Sci Total Environ. 109.110:411-421
2-Chloroaniline		1.9	1.18469	Zok, et al (1991) Sci Total Environ. 109.110:411-421
3-Chloroaniline		1.88	1.0607	Zok, et al (1991) Sci Total Environ. 109.110:411-421
4-Chloroaniline		1.83	0.908485	Zok, et al (1991) Sci Total Environ. 109.110:411-421
2,4-Dichloroaniline		2.79	1.97635	Zok, et al (1991) Sci Total Environ. 109.110:411-421
3,4-Dichloroaniline		2.79	1.48001	Zok, et al (1991) Sci Total Environ. 109.110:411-421
2-Nitroaniline		1.78	0.908485	Zok, et al (1991) Sci Total Environ. 109.110:411-421
3-Nitroaniline		1.31	0.919078	Zok, et al (1991) Sci Total Environ. 109.110:411-421
4-Nitroaniline		1.31	0.643453	Zok, et al (1991) Sci Total Environ. 109.110:411-421
alpha-HCH		3.82	3.04139	Butte, et al (1991) Sci Total Environ. 109.110:377-382
beta-HCH		3.8	3.16435	Butte, et al (1991) Sci Total Environ. 109.110:377-382
gamma-HCH		3.72	2.92942	Butte, et al (1991) Sci Total Environ. 109.110:377-382
delta-HCH		4.14	3.24797	Butte, et al (1991) Sci Total Environ. 109.110:377-382
profenofos		1.7	2.09924	Min and Cha (2000) Bull Environ Contam Toxicol. 65:611-617
phosphamidon		0.8	-0.0338583	Min and Cha (2000) Bull Environ Contam Toxicol. 65:611-617
RDX		0.9	2.23	Mukhi and Patino (2008) Chemosphere. 72:726-732
Cyclohexane	1,2,3,4,5,6-hexachloro-,(1a,2a,3B,4a,5a,6B)-	3.72	2.95	Arnot & Gobas (2006) Environ. Rev. 14:257-297
Benzenamine		0.9	0.41	Arnot & Gobas (2006) Environ. Rev. 14:257-297
Phenol	pentachloro-	5.12	2.99	Arnot & Gobas (2006) Environ. Rev. 14:257-297
Benzenamine	2-nitro	1.85	0.91	Arnot & Gobas (2006) Environ. Rev. 14:257-297
Phenol	, 2-(1-methylpropyl)-4,6-dinitro-	3.56	0.77	Arnot & Gobas (2006) Environ. Rev. 14:257-297
Phenol	2-methyl-	1.95	1.03	Arnot & Gobas (2006) Environ. Rev. 14:257-297
Benzenamine	2-chloro-	1.9	1.18	Arnot & Gobas (2006) Environ. Rev. 14:257-297
Benzenamine	3,4-dichloro	2.69	1.60333	Arnot & Gobas (2006) Environ. Rev. 14:257-297
Benzenamine	2,3-dinitro-	1.84	1.11	Arnot & Gobas (2006) Environ. Rev. 14:257-297
Phenol	4-(1,1-dimethylethyl)-	3.31	1.86	Arnot & Gobas (2006) Environ. Rev. 14:257-297
Benzenamine	3-nitro-	1.37	0.92	Arnot & Gobas (2006) Environ. Rev. 14:257-297
Benzenamine	4-nitro-	1.39	0.64	Arnot & Gobas (2006) Environ. Rev. 14:257-297
Phenol	4-nitro-	1.91	1.23	Arnot & Gobas (2006) Environ. Rev. 14:257-297
Benzonitrile	4-hydroxy-	1.6	0.91	Arnot & Gobas (2006) Environ. Rev. 14:257-297
Benzene	1,2,3,4-tetrachloro-5,6-dimethoxy-	4.86	4.4	Arnot & Gobas (2006) Environ. Rev. 14:257-297
1,3,5-Triazine-2,4-diamine,6-chloro-N-ethyl-N(1-methlethl)-		2.61	0.765	Arnot & Gobas (2006) Environ. Rev. 14:257-297
Benzene	1,2,3-tricholoro-4,5-dimethoxy-	4.01	3.5	Arnot & Gobas (2006) Environ. Rev. 14:257-297
Benzenamine	4-chloro-	1.83	0.91	Arnot & Gobas (2006) Environ. Rev. 14:257-297
Benzenamine	3-chloro-	1.88	1.06	Arnot & Gobas (2006) Environ. Rev. 14:257-297
Phenol	3-chloro-	2.5	1.25	Arnot & Gobas (2006) Environ. Rev. 14:257-297
Phenol		1.46	1.24	Arnot & Gobas (2006) Environ. Rev. 14:257-297
Phenol	2,4,6-tribromo-	4.13	2.71	Arnot & Gobas (2006) Environ. Rev. 14:257-297
Phosphorothioic acid	o,o-diethyl o-[6-methyl-2-(1-methyl)-4-pyrimidinyl] ester	3.81	2.08	Arnot & Gobas (2006) Environ. Rev. 14:257-297
Phenol	2-methyl-4,6-dinitro-	2.12	0.16	Arnot & Gobas (2006) Environ. Rev. 14:257-297
Benzenamine	2,4-dichloro-	2.78	1.98	Arnot & Gobas (2006) Environ. Rev. 14:257-297
Phenol	3-nitro-	2	1.4	Arnot & Gobas (2006) Environ. Rev. 14:257-297
Dodecanoic acid	sodium salt	1.19	2.40857	Arnot & Gobas (2006) Environ. Rev. 14:257-297
Benzonitrile	4-hydroxy-	1.6	0.91	Arnot & Gobas (2006) Environ. Rev. 14:257-297
Hexaconazole	(+)	3.9	1.76275	Wang, et. Al (2015) Chemosphere. 138:798-805
Hexaconazole	(-)	3.9	1.93792	Wang, et. Al (2015) Chemosphere. 138:798-805
Dichlorvos		1.16	-0.09691	Cha & Bae (2014) Res. J. Environ. Toxicol. 8(3):110-116
Phosalone		4.3	1.73151	Cha & Bae (2014) Res. J. Environ. Toxicol. 8(3):110-116

## Sheet: Zebrafish Embryos
Chemical Name	log Kow		log BCF	Reference
Chlorpyrifos	4.96		3.695	El-Amrani, et al. (2012) Sci Tot Env 425:184-190
Atrazine	2.61		0.885	El-Amrani, et al. (2012) Sci Tot Env 425:184-190
Dicofol	5.02		4.32	El-Amrani, et al. (2012) Sci Tot Env 425:184-190
Phenathrene	4.57		3.80855	Schreiber, et al. (2009) Chemosphere 77(7):928-933
6-OH-BDE-47	6.59		1.42975	Liu, et al. (2015) Environ Sci Technol 49:1823-1833
6-MeO-BDE-47	7.17		3.08171	Liu, et al. (2015) Environ Sci Technol 49:1823-1833
BDE-47	6.76		3.39602	Liu, et al. (2015) Environ Sci Technol 49:1823-1833
Endosulfan I	3.83		1.97313	Stanley, et al (2009) Aquat Tox 95(4): 355-361
endosulfan sulfate	3.66		1.83885	Stanley, et al (2009) Aquat Tox 95(4): 355-361
Naphthalene	3.37		3.1	Petersen & Kristensen (1998) Env Tox Chem 17(7): 1385-1395
Phenanthrene	4.57		3.9	Petersen & Kristensen (1998) Env Tox Chem 17(7): 1385-1395
Pyrene	5.18		4.74	Petersen & Kristensen (1998) Env Tox Chem 17(7): 1385-1395
Benzo[a]pyrene	6.5		5.52	Petersen & Kristensen (1998) Env Tox Chem 17(7): 1385-1395
PCB 31	5.7		4.8	Petersen & Kristensen (1998) Env Tox Chem 17(7): 1385-1395
PCB 105	6.33		5.54	Petersen & Kristensen (1998) Env Tox Chem 17(7): 1385-1395
Permethrin	4.9		2.69	Tu, et al. (2014) Ecotox Environ Safety 107:186-191
Bifenthrin	5.4		2.44	Tu, et al. (2014) Ecotox Environ Safety 107:186-191
lambda-cyhalothrin	5.5		2.79	Tu, et al. (2014) Ecotox Environ Safety 107:186-191
3,4-DCA	2.79		1.9345	Hertl & Nagel (1993) Chemosphere 27(11):2225-2234
n-Propylamine	0.48	1.99	0.298853	Brust (2001) Dissertation, Ph.D. Thesis, Univ of Dresden
Isopropylamine	0.26	1.57	0.1959	Brust (2001) Dissertation, Ph.D. Thesis, Univ of Dresden
n-Butylamine	0.97	3.34	0.523746	Brust (2001) Dissertation, Ph.D. Thesis, Univ of Dresden
sec-Butylamin	0.74	2.62	0.418301	Brust (2001) Dissertation, Ph.D. Thesis, Univ of Dresden
Isobutylamine	0.73	2.59	0.4133	Brust (2001) Dissertation, Ph.D. Thesis, Univ of Dresden
n-Pentylamine	1.49	5.8	0.763428	Brust (2001) Dissertation, Ph.D. Thesis, Univ of Dresden
Isopentylamine	1.25	5.39	0.731589	Brust (2001) Dissertation, Ph.D. Thesis, Univ of Dresden
Cyclohexylamin	1.49	5.8	0.763428	Brust (2001) Dissertation, Ph.D. Thesis, Univ of Dresden
n-Hezylamine	2.06	10.63	1.02653	Brust (2001) Dissertation, Ph.D. Thesis, Univ of Dresden
n-Heptylamine	2.57	18.27	1.26174	Brust (2001) Dissertation, Ph.D. Thesis, Univ of Dresden
n-Octylamine	2.9	25.93	1.4138	Brust (2001) Dissertation, Ph.D. Thesis, Univ of Dresden
n-Nonylamine	3.29	43.62	1.63969	Brust (2001) Dissertation, Ph.D. Thesis, Univ of Dresden
n-Decylamine	3.78	73.38	1.86558	Brust (2001) Dissertation, Ph.D. Thesis, Univ of Dresden
Diethlamine	0.58	2.21	0.344392	Brust (2001) Dissertation, Ph.D. Thesis, Univ of Dresden
Morpholine	-0.86	0.48	-0.318759	Brust (2001) Dissertation, Ph.D. Thesis, Univ of Dresden
Piperidine	0.84	2.91	0.463893	Brust (2001) Dissertation, Ph.D. Thesis, Univ of Dresden
2-Methylpiperidine	1.61	4.55	0.658011	Brust (2001) Dissertation, Ph.D. Thesis, Univ of Dresden
4-Methylpiperidine	1.61	4.55	0.658011	Brust (2001) Dissertation, Ph.D. Thesis, Univ of Dresden
Hexamethyleneimine	1.68	7.1	0.851258	Brust (2001) Dissertation, Ph.D. Thesis, Univ of Dresden
2-Ethylpiperidine	1.64	7.65	0.883661	Brust (2001) Dissertation, Ph.D. Thesis, Univ of Dresden
Diisopropylamine	1.67	5.28	0.722634	Brust (2001) Dissertation, Ph.D. Thesis, Univ of Dresden
Dipropylamine	2.1	7.03	0.846955	Brust (2001) Dissertation, Ph.D. Thesis, Univ of Dresden
Diisobutylamine	2.83	20.53	1.31239	Brust (2001) Dissertation, Ph.D. Thesis, Univ of Dresden
Dibutylamine	2.63	24.07	1.38148	Brust (2001) Dissertation, Ph.D. Thesis, Univ of Dresden
Dipentylamine	3.76	68.13	1.83334	Brust (2001) Dissertation, Ph.D. Thesis, Univ of Dresden
Dicyclhezylamine	4.37	106.3	2.02653	Brust (2001) Dissertation, Ph.D. Thesis, Univ of Dresden
N,N-Dimethylethylamine	0.7	2.51	0.399674	Brust (2001) Dissertation, Ph.D. Thesis, Univ of Dresden
N,N-Diethylmthylamine	1.02	4.22	0.625312	Brust (2001) Dissertation, Ph.D. Thesis, Univ of Dresden
1-Methylpiperidine	1.3	4.74	0.675778	Brust (2001) Dissertation, Ph.D. Thesis, Univ of Dresden
N,N-Dimethylbutylamine	1.7	7.25	0.860338	Brust (2001) Dissertation, Ph.D. Thesis, Univ of Dresden
Triethylamine	1.45	5.56	0.745075	Brust (2001) Dissertation, Ph.D. Thesis, Univ of Dresden
1-Ethylpiperidine	1.49	7.65	0.883661	Brust (2001) Dissertation, Ph.D. Thesis, Univ of Dresden
N,N-Dimethylcyclohexylamine	2.31	11.95	1.07737	Brust (2001) Dissertation, Ph.D. Thesis, Univ of Dresden
N,N-Diisopropylethylamine	2.35	17.69	1.24773	Brust (2001) Dissertation, Ph.D. Thesis, Univ of Dresden
Tripropylamine	2.79	23.07	1.36305	Brust (2001) Dissertation, Ph.D. Thesis, Univ of Dresden
Tributylamine	4.46	109.8	2.0406	Brust (2001) Dissertation, Ph.D. Thesis, Univ of Dresden

## Sheet: Other Fish Species
Species	Chemical CAS	log Kow	log BCF
Osmerus mordax	50293	6.79	6.16667		Reference:	Arnot & Gobas (2006) Environ. Rev. 14:257-297
Osmerus mordax	58899	4.26	3.43
Osmerus mordax	72548	5.87	5.33
Osmerus mordax	72559	6	6.45
Osmerus mordax	118741	5.86	4.97
Osmerus mordax	319846	4.26	3.245
Osmerus mordax	608935	5.22	4.46
Osmerus mordax	2051243	10.2	6.49
Osmerus mordax	2385855	7.01	6.075
Osmerus mordax	2437798	6.34	5.525
Osmerus mordax	7012375	5.69	5.31
Osmerus mordax	12789036	6.26	5
Osmerus mordax	16606023	5.69	5.32
Osmerus mordax	29082744	7.46	6.19
Osmerus mordax	31508006	6.98	6.16
Osmerus mordax	32598100	6.34	5.62667
Osmerus mordax	32598111	6.34	6.005
Osmerus mordax	32598133	6.34	4.71
Osmerus mordax	32598144	6.98	6.36333
Osmerus mordax	32690930	6.34	5.97
Osmerus mordax	32774166	7.62	5.55
Osmerus mordax	35065271	7.62	6.31667
Osmerus mordax	35065282	7.62	6.32333
Osmerus mordax	35065293	8.27	6.24667
Osmerus mordax	35065306	8.27	6.66
Osmerus mordax	35693993	6.34	5.42333
Osmerus mordax	35694087	8.91	6.03333
Osmerus mordax	36559225	6.34	5.965
Osmerus mordax	37680652	5.69	5.22
Osmerus mordax	37680732	6.98	5.8
Osmerus mordax	38379996	6.98	5.495
Osmerus mordax	38380017	6.98	5.60667
Osmerus mordax	38380028	6.98	6.29333
Osmerus mordax	38380039	6.98	6.03667
Osmerus mordax	38380040	7.62	6.13
Osmerus mordax	38380051	7.62	5.715
Osmerus mordax	38380084	7.62	6.38
Osmerus mordax	38411255	8.27	6.555
Osmerus mordax	39801144	6.79	6.06
Osmerus mordax	41464395	6.34	5.46333
Osmerus mordax	41464408	6.34	5.35333
Osmerus mordax	41464431	6.34	6.41
Osmerus mordax	51908168	7.62	6.675
Osmerus mordax	52663588	6.34	5.87
Osmerus mordax	52663602	6.98	6.605
Osmerus mordax	52663613	6.98	5.925
Osmerus mordax	52663624	6.98	6.44
Osmerus mordax	52663635	7.62	6.2
Osmerus mordax	52663680	8.27	6.17
Osmerus mordax	52663691	8.27	6.705
Osmerus mordax	52663704	8.27	6.73
Osmerus mordax	52663759	8.91	6.37
Osmerus mordax	52663760	8.91	6.565
Osmerus mordax	52663782	8.91	6.36
Osmerus mordax	52712046	7.62	6.24
Osmerus mordax	57465288	6.98	5.13
Osmerus mordax	65510454	6.98	6.09
Osmerus mordax	68194058	6.98	5.15
Osmerus mordax	70362504	6.34	4.97
Alosa pseudoharengus	50293	6.79	6.27
Alosa pseudoharengus	58899	4.26	3.85
Alosa pseudoharengus	72548	5.87	5.54
Alosa pseudoharengus	72559	6	6.37
Alosa pseudoharengus	118741	5.86	4.535
Alosa pseudoharengus	319846	4.26	3.67
Alosa pseudoharengus	608935	5.22	3.54
Alosa pseudoharengus	877112	5.76	5.21
Alosa pseudoharengus	2051243	10.2	6.35
Alosa pseudoharengus	2385855	7.01	6.16
Alosa pseudoharengus	2437798	6.34	5.64
Alosa pseudoharengus	7012375	5.69	5.48
Alosa pseudoharengus	12789036	6.26	5.45
Alosa pseudoharengus	16606023	5.69	4.91
Alosa pseudoharengus	29082744	7.46	6.33
Alosa pseudoharengus	31508006	6.98	6.02667
Alosa pseudoharengus	32598100	6.34	5.71
Alosa pseudoharengus	32598111	6.34	5.8
Alosa pseudoharengus	32598133	6.34	4.57
Alosa pseudoharengus	32598144	6.98	6.15667
Alosa pseudoharengus	32690930	6.34	5.9
Alosa pseudoharengus	32774166	7.62	5.48
Alosa pseudoharengus	33025411	6.34	5.66
Alosa pseudoharengus	35065271	7.62	6.2175
Alosa pseudoharengus	35065282	7.62	6.32667
Alosa pseudoharengus	35065293	8.27	6.39667
Alosa pseudoharengus	35065306	8.27	6.575
Alosa pseudoharengus	35693993	6.34	5.43
Alosa pseudoharengus	35694087	8.91	5.86333
Alosa pseudoharengus	36559225	6.34	5.99
Alosa pseudoharengus	37680652	5.69	5.04
Alosa pseudoharengus	37680732	6.98	5.9
Alosa pseudoharengus	38379996	6.98	5.89
Alosa pseudoharengus	38380017	6.98	5.98
Alosa pseudoharengus	38380028	6.98	6.05
Alosa pseudoharengus	38380039	6.98	6.07333
Alosa pseudoharengus	38380040	7.62	6.485
Alosa pseudoharengus	38380051	7.62	6.05
Alosa pseudoharengus	38380084	7.62	5.97
Alosa pseudoharengus	38411222	7.62	5.97
Alosa pseudoharengus	38411255	8.27	6.87
Alosa pseudoharengus	39801144	6.79	6.07
Alosa pseudoharengus	40186718	8.91	5.49
Alosa pseudoharengus	41464395	6.34	5.54333
Alosa pseudoharengus	41464408	6.34	5.49
Alosa pseudoharengus	41464431	6.34	6.52
Alosa pseudoharengus	41464511	6.98	6.06
Alosa pseudoharengus	51908168	7.62	6.65
Alosa pseudoharengus	52663588	6.34	6.285
Alosa pseudoharengus	52663602	6.98	6.66
Alosa pseudoharengus	52663613	6.98	6.61
Alosa pseudoharengus	52663624	6.98	6.59
Alosa pseudoharengus	52663635	7.62	6.34333
Alosa pseudoharengus	52663680	8.27	6.22
Alosa pseudoharengus	52663691	8.27	6.76
Alosa pseudoharengus	52663704	8.27	6.85
Alosa pseudoharengus	52663759	8.91	6.14
Alosa pseudoharengus	52663760	8.91	6.66
Alosa pseudoharengus	52663782	8.91	6.38
Alosa pseudoharengus	52712046	7.62	6.595
Alosa pseudoharengus	57465288	6.98	4.9
Alosa pseudoharengus	65510454	6.98	6.37
Alosa pseudoharengus	68194058	6.98	5.48
Alosa pseudoharengus	70362504	6.34	4.79
Cottus cognatus	50293	6.79	6.18
Cottus cognatus	58899	4.26	3.95
Cottus cognatus	72548	5.87	5.7
Cottus cognatus	72559	6	6.4
Cottus cognatus	87683	4.72	4.44
Cottus cognatus	118741	5.86	5.4
Cottus cognatus	120821	3.93	3.47
Cottus cognatus	319846	4.26	3.59
Cottus cognatus	608935	5.22	4.56
Cottus cognatus	634662	4.57	3.81
Cottus cognatus	877112	5.76	5.15
Cottus cognatus	2051243	10.2	6.85
Cottus cognatus	2385855	7.01	6.26
Cottus cognatus	2437798	6.34	5
Cottus cognatus	7012375	5.69	5.23
Cottus cognatus	12789036	6.26	5.95
Cottus cognatus	16606023	5.69	4.69
Cottus cognatus	29082744	7.46	6.53
Cottus cognatus	31508006	6.98	6.02
Cottus cognatus	32598100	6.34	5.765
Cottus cognatus	32598111	6.34	5.85
Cottus cognatus	32598133	6.34	5.06
Cottus cognatus	32598144	6.98	6.54
Cottus cognatus	32690930	6.34	6.08
Cottus cognatus	32774166	7.62	5.59
Cottus cognatus	35065271	7.62	6.42
Cottus cognatus	35065282	7.62	6.455
Cottus cognatus	35065293	8.27	6.445
Cottus cognatus	35065306	8.27	6.825
Cottus cognatus	35693993	6.34	5.64
Cottus cognatus	35694087	8.91	6.245
Cottus cognatus	36559225	6.34	5.93
Cottus cognatus	37680652	5.69	4.665
Cottus cognatus	37680732	6.98	5.975
Cottus cognatus	38379996	6.98	5.78
Cottus cognatus	38380017	6.98	6.29
Cottus cognatus	38380028	6.98	6.06
Cottus cognatus	38380039	6.98	5.96
Cottus cognatus	38380040	7.62	5.9
Cottus cognatus	38380051	7.62	6.07
Cottus cognatus	38380084	7.62	6.09
Cottus cognatus	38411222	7.62	5.91
Cottus cognatus	38411255	8.27	6.59
Cottus cognatus	39801144	6.79	6.18
Cottus cognatus	41464395	6.34	5.79
Cottus cognatus	41464408	6.34	5.565
Cottus cognatus	41464431	6.34	6.27
Cottus cognatus	51908168	7.62	6.99
Cottus cognatus	52663588	6.34	6
Cottus cognatus	52663602	6.98	6.87
Cottus cognatus	52663613	6.98	6.44
Cottus cognatus	52663624	6.98	6.38
Cottus cognatus	52663635	7.62	6.4
Cottus cognatus	52663680	8.27	6.37
Cottus cognatus	52663691	8.27	7.09
Cottus cognatus	52663704	8.27	7
Cottus cognatus	52663759	8.91	6.16
Cottus cognatus	52663760	8.91	7.05
Cottus cognatus	52663782	8.91	6.58
Cottus cognatus	52712046	7.62	6.65
Cottus cognatus	57465288	6.98	5.07
Cottus cognatus	65510454	6.98	6.26
Cottus cognatus	68194058	6.98	5.24
Cottus cognatus	70362504	6.34	4.83
Oncorhynchus mykiss	50293	6.79	6.62
Oncorhynchus mykiss	58899	4.26	3.97
Oncorhynchus mykiss	67721	4.03	3.18
Oncorhynchus mykiss	87683	4.72	3.6
Oncorhynchus mykiss	95943	4.57	3.7
Oncorhynchus mykiss	118741	5.86	5.57
Oncorhynchus mykiss	120821	3.93	3
Oncorhynchus mykiss	608935	5.22	4.535
Oncorhynchus mykiss	634662	4.57	4.055
Oncorhynchus mykiss	12789036	6.26	5.75
Oncorhynchus mykiss	2539175	3.92	1.7
Oncorhynchus mykiss	2539266	3.1	1.78
Oncorhynchus mykiss	2668248	3.27	2.005
Oncorhynchus mykiss	57057837	3.27	1.6
Micropogonias undulatus	67721	4.03	2.82
Micropogonias undulatus	87683	4.72	3.37
Micropogonias undulatus	95501	3.28	2.28
Micropogonias undulatus	95943	4.57	3.39
Micropogonias undulatus	106467	3.28	2.25
Micropogonias undulatus	108703	3.93	2.74
Micropogonias undulatus	108907	2.64	2.09
Micropogonias undulatus	118741	5.86	4.405
Micropogonias undulatus	120821	3.93	3.255
Micropogonias undulatus	541731	3.28	1.94
Micropogonias undulatus	608935	5.22	4.205
Micropogonias undulatus	634662	4.57	3.765
Micropogonias undulatus	2539131	3.44	3.13
Brevoortia patronus	67721	4.03	3.08
Brevoortia patronus	87683	4.72	4.04
Brevoortia patronus	118741	5.86	4.66
Brevoortia patronus	120821	3.93	3.52
Brevoortia patronus	608935	5.22	4.45
Brevoortia patronus	634662	4.57	3.93
Brevoortia patronus	2539131	3.44	3.45
Fundulus heteroclitus	67721	4.03	3.08
Fundulus heteroclitus	87683	4.72	4.35
Fundulus heteroclitus	118741	5.86	4.16
Fundulus heteroclitus	120821	3.93	3.34
Fundulus heteroclitus	608935	5.22	4.19
Fundulus heteroclitus	634662	4.57	3.68
Fundulus heteroclitus	2539131	3.44	3.29
Leptocottus armatus	84662	2.65	2.29
Leptocottus armatus	84695	4.46	3.15
Leptocottus armatus	84742	4.61	3.05
Leptocottus armatus	84764	9.52	2.2
Leptocottus armatus	85687	4.84	4.01
Leptocottus armatus	117817	8.39	2.83
Leptocottus armatus	117840	8.54	2.71
Leptocottus armatus	131113	1.66	2.98
Squalus acanthias	84662	2.65	2.13
Squalus acanthias	84695	4.46	2.69
Squalus acanthias	84742	4.61	2.46
Squalus acanthias	85687	4.84	3.25
Squalus acanthias	117817	8.39	1.86
Squalus acanthias	117840	8.54	1.75
Squalus acanthias	131113	1.66	3.14
Cynoscion nebulosis	87683	4.72	2.42
Cynoscion nebulosis	95501	3.28	2.15
Cynoscion nebulosis	95943	4.57	2.63
Cynoscion nebulosis	106467	3.28	2.45
Cynoscion nebulosis	108703	3.93	1.87
Cynoscion nebulosis	108907	2.64	1.81
Cynoscion nebulosis	118741	5.86	4.32
Cynoscion nebulosis	120821	3.93	1.9
Cynoscion nebulosis	541731	3.28	1.61
Cynoscion nebulosis	608935	5.22	3.32
Cynoscion nebulosis	634662	4.57	3.04
Cynoscion nebulosis	2539131	3.44	1.49
Ichtalurus furcatus	87683	4.72	3.07
Ichtalurus furcatus	95501	3.28	2.34
Ichtalurus furcatus	95943	4.57	3.42
Ichtalurus furcatus	106467	3.28	2.03
Ichtalurus furcatus	108703	3.93	2.74
Ichtalurus furcatus	108907	2.64	2.88
Ichtalurus furcatus	118741	5.86	4.5
Ichtalurus furcatus	120821	3.93	3.2
Ichtalurus furcatus	541731	3.28	1.92
Ichtalurus furcatus	608935	5.22	4.09
Ichtalurus furcatus	634662	4.57	3.82
Ichtalurus furcatus	2539131	3.44	3.01
Ambloplites rupestris	118741	5.86	4.91333
Ambloplites rupestris	608935	5.22	3.365
Ambloplites rupestris	29082744	7.46	5.64333
Ambloplites rupestris	35065271	7.62	5.86333
Ambloplites rupestris	35693993	6.34	5.23667
Ambloplites rupestris	35694087	8.91	5.97667
Ambloplites rupestris	37680732	6.98	5.56333
Noturus flavus	118741	5.86	5.28
Noturus flavus	608935	5.22	3.69
Noturus flavus	29082744	7.46	6.35
Noturus flavus	35065271	7.62	6.59
Noturus flavus	35693993	6.34	5.24
Noturus flavus	35694087	8.91	6.82
Noturus flavus	37680732	6.98	5.99
Aplodinotus grunniens	118741	5.86	4.7
Aplodinotus grunniens	608935	5.22	2.67
Aplodinotus grunniens	29082744	7.46	5.19
Aplodinotus grunniens	31508006	6.98	5.34
Aplodinotus grunniens	32598111	6.34	4.42
Aplodinotus grunniens	32690930	6.34	4.81
Aplodinotus grunniens	33025411	6.34	5.2
Aplodinotus grunniens	35065271	7.62	6.015
Aplodinotus grunniens	35065282	7.62	5.87
Aplodinotus grunniens	35065293	8.27	6.26
Aplodinotus grunniens	35693993	6.34	4.825
Aplodinotus grunniens	35694087	8.91	6.18
Aplodinotus grunniens	36559225	6.34	5.03
Aplodinotus grunniens	37680732	6.98	5.335
Aplodinotus grunniens	38380017	6.98	5.2
Aplodinotus grunniens	38380028	6.98	4.98
Aplodinotus grunniens	38380039	6.98	5.16
Aplodinotus grunniens	38380040	7.62	5.65
Aplodinotus grunniens	38411255	8.27	5.97
Aplodinotus grunniens	40186718	8.91	5.9
Aplodinotus grunniens	41464395	6.34	4.75
Aplodinotus grunniens	41464408	6.34	4.47
Aplodinotus grunniens	41464511	6.98	5.12
Aplodinotus grunniens	51908168	7.62	6.08
Aplodinotus grunniens	52663588	6.34	4.95
Aplodinotus grunniens	52663635	7.62	5.47
Aplodinotus grunniens	52663691	8.27	6.26
Aplodinotus grunniens	52712046	7.62	6.05
Perca flavescens	118741	5.86	4.8
Perca flavescens	608935	5.22	3.44
Perca flavescens	29082744	7.46	5.38
Perca flavescens	32598111	6.34	4.73
Perca flavescens	32598144	6.98	5.86
Perca flavescens	32690930	6.34	5.01
Perca flavescens	35065271	7.62	5.95
Perca flavescens	35065282	7.62	6.06
Perca flavescens	35065293	8.27	6.35
Perca flavescens	35693993	6.34	4.96
Perca flavescens	35694087	8.91	6.12
Perca flavescens	36559225	6.34	5.2
Perca flavescens	37680732	6.98	5.4
Perca flavescens	38380017	6.98	5.53
Perca flavescens	38380028	6.98	5.3
Perca flavescens	38380039	6.98	5.54
Perca flavescens	38380040	7.62	6.08
Perca flavescens	38411255	8.27	6.43
Perca flavescens	40186718	8.91	5.98
Perca flavescens	41464395	6.34	5.04
Perca flavescens	41464408	6.34	4.75
Perca flavescens	41464511	6.98	5.48
Perca flavescens	51908168	7.62	6.31
Perca flavescens	52663588	6.34	5.23
Perca flavescens	52663635	7.62	6.27
Perca flavescens	52663691	8.27	6.37
Perca flavescens	52712046	7.62	6.3
Morone chrysops	118741	5.86	5.16
Morone chrysops	608935	5.22	4.02
Morone chrysops	29082744	7.46	5.67
Morone chrysops	35065271	7.62	7.11
Morone chrysops	35693993	6.34	5.98
Morone chrysops	37680732	6.98	6.57
Moxostoma macrolepidotum	118741	5.86	5.05
Moxostoma macrolepidotum	608935	5.22	3.05
Moxostoma macrolepidotum	29082744	7.46	6.76
Moxostoma macrolepidotum	35065271	7.62	6.18
Moxostoma macrolepidotum	35693993	6.34	4.25
Moxostoma macrolepidotum	35694087	8.91	6.52
Moxostoma macrolepidotum	37680732	6.98	5.65
Morone americana	118741	5.86	4.94
Morone americana	608935	5.22	3.72
Morone americana	29082744	7.46	5.69
Morone americana	31508006	6.98	5.75
Morone americana	32598111	6.34	5.05
Morone americana	32598144	6.98	6.41
Morone americana	32690930	6.34	5.38
Morone americana	33025411	6.34	5.6
Morone americana	35065271	7.62	6.64
Morone americana	35065282	7.62	6.6
Morone americana	35065293	8.27	6.81
Morone americana	35693993	6.34	5.685
Morone americana	36559225	6.34	5.29
Morone americana	37680732	6.98	5.965
Morone americana	38380017	6.98	5.83
Morone americana	38380028	6.98	5.98
Morone americana	38380039	6.98	6.18
Morone americana	38380040	7.62	6.47
Morone americana	38411255	8.27	6.9
Morone americana	40186718	8.91	6.37
Morone americana	41464395	6.34	5.07
Morone americana	41464408	6.34	4.82
Morone americana	41464511	6.98	5.71
Morone americana	51908168	7.62	6.74
Morone americana	52663588	6.34	5.47
Morone americana	52663635	7.62	6.44
Morone americana	52663691	8.27	6.8
Morone americana	52712046	7.62	6.81
Cottus bairdi	118741	5.86	3.91
Cottus bairdi	608935	5.22	2.81
Cottus bairdi	29082744	7.46	5.91
Cottus bairdi	35065271	7.62	6.31
Cottus bairdi	35693993	6.34	4.87
Cottus bairdi	35694087	8.91	6.3
Cottus bairdi	37680732	6.98	5.35
Cottus bairdi	1912249	2.82	0.3
Dorosoma cepedianum	118741	5.86	4.17
Dorosoma cepedianum	608935	5.22	3.1
Dorosoma cepedianum	29082744	7.46	5.59
Dorosoma cepedianum	31508006	6.98	6.09
Dorosoma cepedianum	32598111	6.34	5.46
Dorosoma cepedianum	32598144	6.98	6.33
Dorosoma cepedianum	32690930	6.34	5.86
Dorosoma cepedianum	33025411	6.34	5.8
Dorosoma cepedianum	35065271	7.62	6.08
Dorosoma cepedianum	35065282	7.62	6.55
Dorosoma cepedianum	35065293	8.27	6.65
Dorosoma cepedianum	35693993	6.34	5.32
Dorosoma cepedianum	35694087	8.91	5.82
Dorosoma cepedianum	36559225	6.34	5.79
Dorosoma cepedianum	37680732	6.98	5.555
Dorosoma cepedianum	38380017	6.98	6.08
Dorosoma cepedianum	38380028	6.98	5.8
Dorosoma cepedianum	38380039	6.98	6.07
Dorosoma cepedianum	38380040	7.62	6.4
Dorosoma cepedianum	38411255	8.27	6.95
Dorosoma cepedianum	40186718	8.91	6.51
Dorosoma cepedianum	41464395	6.34	5.49
Dorosoma cepedianum	41464408	6.34	5.6
Dorosoma cepedianum	41464511	6.98	5.96
Dorosoma cepedianum	51908168	7.62	6.68
Dorosoma cepedianum	52663588	6.34	5.97
Dorosoma cepedianum	52663635	7.62	6.42
Dorosoma cepedianum	52663691	8.27	6.82
Dorosoma cepedianum	52712046	7.62	6.69
Notropis hudsonius	118741	5.86	4.62
Notropis hudsonius	608935	5.22	3.28
Notropis hudsonius	29082744	7.46	5.98
Notropis hudsonius	35065271	7.62	6.14
Notropis hudsonius	35693993	6.34	5.74
Notropis hudsonius	35694087	8.91	6.2
Notropis hudsonius	37680732	6.98	5.8
Notropis atherinoides	118741	5.86	4.73
Notropis atherinoides	608935	5.22	3.42
Notropis atherinoides	29082744	7.46	5.82
Notropis atherinoides	31508006	6.98	6.26
Notropis atherinoides	32598111	6.34	5.67
Notropis atherinoides	32598144	6.98	6.41
Notropis atherinoides	32690930	6.34	6.08
Notropis atherinoides	33025411	6.34	6.11
Notropis atherinoides	35065271	7.62	6.455
Notropis atherinoides	35065282	7.62	6.6
Notropis atherinoides	35065293	8.27	6.81
Notropis atherinoides	35693993	6.34	5.725
Notropis atherinoides	35694087	8.91	6.88
Notropis atherinoides	36559225	6.34	5.97
Notropis atherinoides	37680732	6.98	6.055
Notropis atherinoides	38380017	6.98	6.14
Notropis atherinoides	38380028	6.98	5.98
Notropis atherinoides	38380039	6.98	6.18
Notropis atherinoides	38380040	7.62	6.47
Notropis atherinoides	38411255	8.27	6.9
Notropis atherinoides	40186718	8.91	6.37
Notropis atherinoides	41464395	6.34	5.71
Notropis atherinoides	41464408	6.34	5.79
Notropis atherinoides	41464511	6.98	6.11
Notropis atherinoides	51908168	7.62	6.74
Notropis atherinoides	52663588	6.34	6.11
Notropis atherinoides	52663635	7.62	6.44
Notropis atherinoides	52663691	8.27	6.8
Notropis atherinoides	52712046	7.62	6.81
Labidesthes sicculus	118741	5.86	4.15
Labidesthes sicculus	608935	5.22	3.27
Labidesthes sicculus	29082744	7.46	4.29
Labidesthes sicculus	35065271	7.62	6.27
Labidesthes sicculus	35693993	6.34	5.69
Labidesthes sicculus	35694087	8.91	6.45
Labidesthes sicculus	37680732	6.98	5.96
Catostomus commersonii	2051243	10.2	5.11
Catostomus commersonii	31508006	6.98	4.69
Catostomus commersonii	32598100	6.34	5.4
Catostomus commersonii	32598111	6.34	4.81
Catostomus commersonii	32598133	6.34	4.55
Catostomus commersonii	32598144	6.98	5.93667
Catostomus commersonii	32690930	6.34	5.3
Catostomus commersonii	32774166	7.62	5.19
Catostomus commersonii	33025411	6.34	5.22
Catostomus commersonii	35065271	7.62	6.07667
Catostomus commersonii	35065282	7.62	6.06333
Catostomus commersonii	35065293	8.27	6.23
Catostomus commersonii	35065306	8.27	5.57
Catostomus commersonii	35693993	6.34	4.56667
Catostomus commersonii	35694087	8.91	5.2
Catostomus commersonii	36559225	6.34	5.125
Catostomus commersonii	37680732	6.98	5.4
Catostomus commersonii	38380017	6.98	5.55667
Catostomus commersonii	38380028	6.98	5.35333
Catostomus commersonii	38380039	6.98	5.48667
Catostomus commersonii	38380040	7.62	6.325
Catostomus commersonii	38380084	7.62	5.34
Catostomus commersonii	38411255	8.27	6.67
Catostomus commersonii	40186718	8.91	6.35
Catostomus commersonii	41464395	6.34	4.81
Catostomus commersonii	41464408	6.34	4.63333
Catostomus commersonii	41464511	6.98	5.665
Catostomus commersonii	51908168	7.62	6.535
Catostomus commersonii	52663588	6.34	5.325
Catostomus commersonii	52663635	7.62	5.65
Catostomus commersonii	52663691	8.27	6.655
Catostomus commersonii	52663759	8.91	5.39
Catostomus commersonii	52663782	8.91	5.51
Catostomus commersonii	52712046	7.62	6.435
Catostomus commersonii	57465288	6.98	4.63
Catostomus commersonii	70362504	6.34	4.57
Salvelinus namaycush	2051243	10.2	6.56
Salvelinus namaycush	16606023	5.69	5.38
Salvelinus namaycush	31508006	6.98	6.1
Salvelinus namaycush	32598100	6.34	6.53
Salvelinus namaycush	32598133	6.34	5.3
Salvelinus namaycush	32598144	6.98	6.44
Salvelinus namaycush	32774166	7.62	5.46
Salvelinus namaycush	35065271	7.62	6.41
Salvelinus namaycush	35065282	7.62	6.45
Salvelinus namaycush	35065293	8.27	6.45
Salvelinus namaycush	35065306	8.27	6.45
Salvelinus namaycush	35693993	6.34	5.78
Salvelinus namaycush	35694087	8.91	6.27
Salvelinus namaycush	37680652	5.69	5.31
Salvelinus namaycush	37680732	6.98	6.13
Salvelinus namaycush	38380017	6.98	6.48
Salvelinus namaycush	38380028	6.98	6.12
Salvelinus namaycush	38380039	6.98	6.05
Salvelinus namaycush	38380084	7.62	6.27
Salvelinus namaycush	41464395	6.34	6.09
Salvelinus namaycush	41464408	6.34	5.62
Salvelinus namaycush	52663635	7.62	5.95
Salvelinus namaycush	52663759	8.91	6.39
Salvelinus namaycush	52663782	8.91	6.61
Salvelinus namaycush	57465288	6.98	5.13
Salvelinus namaycush	70362504	6.34	4.97
Stizostedion vitreum	31508006	6.98	5.01
Stizostedion vitreum	32598111	6.34	4.39
Stizostedion vitreum	32598144	6.98	5.23
Stizostedion vitreum	32690930	6.34	4.63
Stizostedion vitreum	33025411	6.34	4.86
Stizostedion vitreum	35065271	7.62	5.51
Stizostedion vitreum	35065282	7.62	5.43
Stizostedion vitreum	35693993	6.34	4.31
Stizostedion vitreum	37680732	6.98	4.88
Stizostedion vitreum	38380017	6.98	4.91
Stizostedion vitreum	38380028	6.98	4.76
Stizostedion vitreum	38380039	6.98	5
Stizostedion vitreum	38380040	7.62	5.29
Stizostedion vitreum	38411255	8.27	5.72
Stizostedion vitreum	40186718	8.91	5.25
Stizostedion vitreum	41464395	6.34	4.44
Stizostedion vitreum	41464408	6.34	4.23
Stizostedion vitreum	41464511	6.98	4.9
Stizostedion vitreum	51908168	7.62	5.58
Stizostedion vitreum	52663588	6.34	4.71
Stizostedion vitreum	52663635	7.62	5.28
Stizostedion vitreum	52663691	8.27	5.61
Micropterus dolomieu	31508006	6.98	5.89
Micropterus dolomieu	32598111	6.34	5.1
Micropterus dolomieu	32598144	6.98	6.11
Micropterus dolomieu	32690930	6.34	5.46
Micropterus dolomieu	33025411	6.34	5.55
Micropterus dolomieu	35065271	7.62	6.45
Micropterus dolomieu	35065282	7.62	6.36
Micropterus dolomieu	35065293	8.27	6.58
Micropterus dolomieu	35693993	6.34	5.17
Micropterus dolomieu	36559225	6.34	5.42
Micropterus dolomieu	37680732	6.98	5.73
Micropterus dolomieu	38380017	6.98	5.71
Micropterus dolomieu	38380028	6.98	5.64
Micropterus dolomieu	38380039	6.98	5.87
Micropterus dolomieu	38380040	7.62	6.23
Micropterus dolomieu	38411255	8.27	6.7
Micropterus dolomieu	40186718	8.91	6.21
Micropterus dolomieu	41464395	6.34	5.32
Micropterus dolomieu	41464408	6.34	5.25
Micropterus dolomieu	41464511	6.98	5.81
Micropterus dolomieu	51908168	7.62	6.53
Micropterus dolomieu	52663588	6.34	5.62
Micropterus dolomieu	52663635	7.62	6.25
Micropterus dolomieu	52663691	8.27	6.63
Micropterus dolomieu	52712046	7.62	6.55
Percopsis omiscomaycus	31508006	6.98	5.79
Percopsis omiscomaycus	32598111	6.34	4.99
Percopsis omiscomaycus	32598144	6.98	6.08
Percopsis omiscomaycus	32690930	6.34	5.23
Percopsis omiscomaycus	33025411	6.34	5.5
Percopsis omiscomaycus	35065271	7.62	6.45
Percopsis omiscomaycus	35065282	7.62	6.38
Percopsis omiscomaycus	35065293	8.27	6.77
Percopsis omiscomaycus	35693993	6.34	5.02
Percopsis omiscomaycus	36559225	6.34	5.43
Percopsis omiscomaycus	37680732	6.98	5.63
Percopsis omiscomaycus	38380017	6.98	5.69
Percopsis omiscomaycus	38380028	6.98	5.48
Percopsis omiscomaycus	38380039	6.98	5.75
Percopsis omiscomaycus	38380040	7.62	6.16
Percopsis omiscomaycus	38411255	8.27	6.76
Percopsis omiscomaycus	40186718	8.91	6.43
Percopsis omiscomaycus	41464395	6.34	5.15
Percopsis omiscomaycus	41464408	6.34	5.06
Percopsis omiscomaycus	41464511	6.98	5.67
Percopsis omiscomaycus	51908168	7.62	6.51
Percopsis omiscomaycus	52663588	6.34	5.54
Percopsis omiscomaycus	52663635	7.62	6.19
Percopsis omiscomaycus	52663691	8.27	6.69
Percopsis omiscomaycus	52712046	7.62	6.53
Pomoxis nigromaculatus	32598111	6.34	4.15
Pomoxis nigromaculatus	32598144	6.98	5.53
Pomoxis nigromaculatus	32690930	6.34	4.72
Pomoxis nigromaculatus	35065271	7.62	5.88
Pomoxis nigromaculatus	35065282	7.62	5.77
Pomoxis nigromaculatus	35065293	8.27	6.01
Pomoxis nigromaculatus	35693993	6.34	4.51
Pomoxis nigromaculatus	36559225	6.34	4.91
Pomoxis nigromaculatus	37680732	6.98	5.13
Pomoxis nigromaculatus	38380017	6.98	5.23
Pomoxis nigromaculatus	38380028	6.98	4.96
Pomoxis nigromaculatus	38380039	6.98	5.16
Pomoxis nigromaculatus	38380040	7.62	5.76
Pomoxis nigromaculatus	38411255	8.27	6.1
Pomoxis nigromaculatus	40186718	8.91	5.59
Pomoxis nigromaculatus	41464395	6.34	4.69
Pomoxis nigromaculatus	41464408	6.34	4.49
Pomoxis nigromaculatus	41464511	6.98	5.03
Pomoxis nigromaculatus	51908168	7.62	5.89
Pomoxis nigromaculatus	52663588	6.34	4.96
Pomoxis nigromaculatus	52663635	7.62	5.58
Pomoxis nigromaculatus	52663691	8.27	5.98
Pomoxis nigromaculatus	52712046	7.62	5.91
Micropterus salmoides	50293	6.79	5.5
Micropterus salmoides	32598111	6.34	5.66
Micropterus salmoides	32598144	6.98	6.76
Micropterus salmoides	32690930	6.34	6.09
Micropterus salmoides	35065271	7.62	7.1
Micropterus salmoides	35065282	7.62	7
Micropterus salmoides	35065293	8.27	7.33
Micropterus salmoides	35693993	6.34	5.75
Micropterus salmoides	36559225	6.34	5.97
Micropterus salmoides	37680732	6.98	6.33
Micropterus salmoides	38380017	6.98	6.39
Micropterus salmoides	38380028	6.98	6.23
Micropterus salmoides	38380039	6.98	6.47
Micropterus salmoides	38380040	7.62	6.96
Micropterus salmoides	38411255	8.27	7.37
Micropterus salmoides	40186718	8.91	6.9
Micropterus salmoides	41464395	6.34	5.8
Micropterus salmoides	41464408	6.34	5.81
Micropterus salmoides	41464511	6.98	6.41
Micropterus salmoides	51908168	7.62	7.15
Micropterus salmoides	52663588	6.34	6.14
Micropterus salmoides	52663635	7.62	6.89
Micropterus salmoides	52663691	8.27	7.3
Micropterus salmoides	52712046	7.62	7.22
Gambusia affinis	50293	6.79	3.105
Gambusia affinis	58899	4.26	2.3975
Gambusia affinis	108907	2.64	2.81
Gambusia affinis	117840	8.54	2.015
Gambusia affinis	118741	5.86	2.71889
Gambusia affinis	50328	6.11	2.225
Gambusia affinis	62533	1.08	0.78
Gambusia affinis	65850	1.87	1.32
Gambusia affinis	87865	4.74	2.47
Gambusia affinis	92875	1.92	2.04
Gambusia affinis	100663	2.07	1.34
Gambusia affinis	330541	2.67	2.46
Gambusia affinis	579668	3.15	2.08
Gambusia affinis	1582098	5.31	3.161
Gambusia affinis	1912249	2.82	0.894286
